# Supplementary material
Source: publisher site journal article supplement (https://www.dovepress.com/article/487878)
Supplement: Supplementary file 1 [file get_supplementary_file.php]

**Investigation on the Development of "Internet + nursing services" in Guizhou Province**

**1. Basic information**

1. Your name----

2. Your gender-male, female

3. Your age----18-24, 25-34, 35-44, 45-54, > 54.

4. Your professional title----Nurse, Nurse Practitioner, Nurse-in-Charge, Associate Professor of Nursing, Professor of Nursing.

5. Your duty----Head nurse in the ward, District head nurse, Functional department chiefor deputy chief of nursing, Director or deputy director of the nursing department, President/Vice President of the hospital, No position

6. Your medical level is----Tertiary Grade A Hospital, Tertiary Grade B Hospital, Tertiary General Hospital, Secondary Grade A Hospital, Secondary Grade B Hospital

**2. The development of "Internet + nursing services" in your hospital**

**1. Does your hospital carry out "Internet Plus nursing services":**

(1) No🞎

If your hospital has the opportunity to conduct "Internet + nursing services", will you choose to participate

🞎Yes

🞎No----Reasons for unwillingness to participate----Busy work in the hospital and unwilling to undertake additional work outside the hospital; The burden of family care is heavy and there is no extra time; Dissatisfaction with the benefits from the provision of services; Others (please supplement the reasons)

(2) Yes (answer the question below)🞎

**2. The types of services provided by your hospital are: online consultation, offline services (one or both of them)**

**(1) Online consultation:**

①. The online consultation time for your hospital to conduct "Internet + nursing services" is----

②. Your hospital carries out "Internet + nursing services" online consultation projects including----(multiple choice or even full choice)

1. Maternal and child care health guidance;
2. Health guidance of cardiac rehabilitation nursing;
3. Diabetes Care Health Guidance;
4. Health guidance for nursing care of chronic diseases of respiratory system;
5. Nursing and health guidance for nervous system diseases;
6. Health guidance of orthopedic system disease care;
7. Nursing health guidance for reproductive system diseases;
8. Nutritional management of nephropathy and health guidance of peritoneal dialysis;
9. Pain care health guidance;
10. Nursing and health guidance for stoma, pressure injury and incontinence dermatitis;
11. Intravenous Catheter (PICC, PORT) Maintenance and Related Complications Nursing Health Guidance
12. Other (please supplement)

③. The most "Internet + nursing services" consultation items carried out by your hospital are----(multiple selections among the above items, and up to three selections are set)

④. Up to now, the number of consultations is----≤ 99, 100-499, 500-999, 1000-4999, 5000-9999, ≥ 10000

**(2) Offline services:**

①. Your hospital carries out "Internet Plus nursing services" offline service hours for----

②. The offline service items of "Internet Plus nursing services" carried out by your hospital include:----(multiple choice or even all choice)

1. Wound stoma care: wound care, stoma care, pressure injury care, incontinence dermatitis care, etc.;
2. Intravenous catheter care: PICC, PORT maintenance and management of related complications;
3. Pipeline care: replacement of gastric tube, urinary tube, etc., tracheotomy care;
4. Basic care: intramuscular injection, enema, etc.;
5. Diabetes care: install dynamic blood glucose monitor and insulin pump;
6. Maternal and infant care: maternal breast care, fetal heart rate auscultation, neonatal umbilical care, jaundice detection;
7. Pain care: maintenance and replacement of drug infusion system (self-controlled analgesia pump).
8. Other (please supplement)

③. The most "Internet + nursing services" offline service items carried out by your hospital are----(multiple selections among the above items, and up to three settings are selected)

④. Your hospital has carried out "Internet + nursing services". Up to now, the number of people who have carried out services is----≤ 99, 100 ~ 499, 500 ~ 999, 1000 ~ 4999, 5000 ~ 9999, ≥ 10000

**3.Have you ever participated in the "Internet + nursing services" carried out by the hospital: Yes No**

**4.Are you a specialist nurse:**

No

Yes (Please fill in specific fields) _ _ _ _ _ _ _ _ _ _

**3. Briefly describe your views on the development of "Internet Plus nursing services" in Guizhou Province**

1. What difficulties do you think Guizhou Province is facing in carrying out "Internet + nursing services" at present, and what kind of help and support do you want as a nursing staff?

2. Do you have any good opinions or suggestions on carrying out "Internet Plus nursing services" in Guizhou Province?
